# Supplementary material for: Improving the specific capacity of nickel hydroxide nanocrystalsviayttrium doping for application in hybrid supercapacitors
Source: Royal Society of Chemistry journal article supplement (doi:10.1039/c9ce00625g), 2019-01-01
Supplement: c9ce00625g1.pdf [file c9ce00625g1.pdf]

## Improving the specific Capacity of Nickel Hydroxide Nanocrystals for Hybrid Supercapacitors via Yttrium Doping

Yuanyi Zhu, ShengliAn, Jinlong Cui, Hengrui Qiu, Xuejiao Sun, Yongqiang Zhang\*, Wenxiu He\*

School of Chemistry and Chemical Engineering, Inner Mongolia University of Science & Technology, Baotou, China

\*Corresponding Author:

E-mail addresses: wenxiu\_he@foxmail.com (W. He), Tel.: ++86-472-5953323(W. He);

yongqiang\_zhang1203@foxmail.com (Y. Zhang).

### 1. Experimental

#### 1.1 Fabrication of Y-doped Ni(OH)<sub>2</sub> composites

In a typical synthesis, Ni(NO<sub>3</sub>)<sub>2</sub>·6H<sub>2</sub>O (2 mmol) and Y(NO<sub>3</sub>)<sub>3</sub>·6H<sub>2</sub>O (Ni/Y mole ratio of 10:1) was dissolved into 40 mL distilled water. 10 mL of 0.2 M ammonia were slowly dropped into the above solution with stirring for 30 min, and the green solution was sealed in 60 mL Teflon-lined autoclave. Then, the autoclave was heated to 180 °C in oven for 18 h. After cooled naturally to room temperature, the Y-Ni10 samples were collected after washed several times and dried at 80 °C overnight. For comparison, the Y-Ni0, Y-Ni5 and Y-Ni20 samples were also fabricated by the similar process (Ni/Y molar ratios of 0, 20:1 and 5:1).

#### 1.2 Sample characterization

The as-prepared samples were characterized by scanning field-emission electron microscopy (SEM, Carl sigma 500 AMCS), transmission electron microscopy (TEM, Talos FEI), X-ray diffraction (XRD, Bruker, D8 ADVANCE) with Cu K $\alpha$  radiation ( $\lambda = 0.15418$  nm), X-ray photoelectron spectroscopy (XPS, Thermo ESCALAB 250ZI), and the nitrogen adsorption apparatus (ASAP2460, SN:543).

### 1.3 Electrochemical evaluation

The working electrodes were fabricated by loading the homogeneous slurry onto nickel foam. The slurry were prepared from 80% active materials, 15% acetylene black, 5% polytetrafluoroethylene and appropriate amount of ethanol solvent. The mass loading of the active material on these electrodes is around 2.1 mg/cm<sup>2</sup>. The electrochemical properties containing galvanostatic charge discharge (GCD), cyclic voltammetry (CV) and electrochemical impedance spectroscopy (EIS) of working electrodes were tested in three-electrode glass cell with 6 M KOH electrolytes, Hg/HgO and platinum-plate were served as the reference and counter electrodes, respectively.

The Y-Ni10//AC cell was constructed by using the Y-Ni10 as the positive and active carbon (AC) as negative electrodes. The mass ratio of was obtained from the equation of  $C_+ \times m_+ \times V_- = C_- \times m_- \times V_+$ , where  $C_+$  and  $C_-$  are the specific capacitance of Y-Ni10 and AC electrodes,  $V_+$  and  $V_-$  are the voltage range of Y-Ni10 and AC,  $m_+$  and  $m_-$  are the active mass loadings of Y-Ni10 and AC, respectively. According to the GCD studies of the individual Y-Ni10 and AC electrodes, the calculated mass ratio of 1:3.86 is used to balance the charges.

The specific capacitance (C, F g<sup>-1</sup>), specific energy density (SE, W h kg<sup>-1</sup>) and power density (SP, W kg<sup>-1</sup>) of Y-Ni10//AC cell was obtained based on the following equation:

$$C = \frac{2I \int V dt}{MV^2 | \frac{V_f}{V_i}} \quad (1)$$

$$SE = \frac{I \int V dt}{M} \quad (2)$$

$$SP = \frac{E}{\Delta t} \quad (3)$$

Where I (A) is the discharge current, M (g) is the total mass of Y-Ni10 and AC materials and  $\Delta t$  (s) is corresponding to discharge time,  $V_i$  and  $V_f$  are the cell voltage of an initial and final value,

respectively.

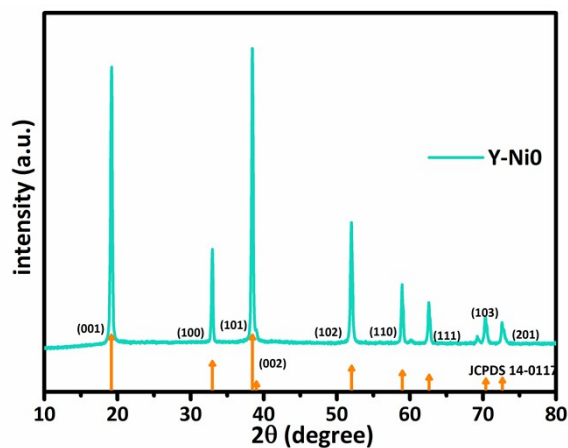

Fig. S1. XRD patterns of Y-NiO

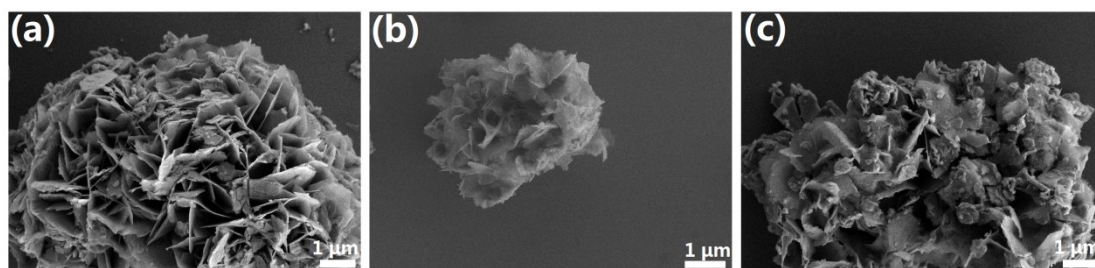

Fig. S2. SEM images of (a) Y-Ni5, (b) Y-Ni10 and (c) Y-Ni20.

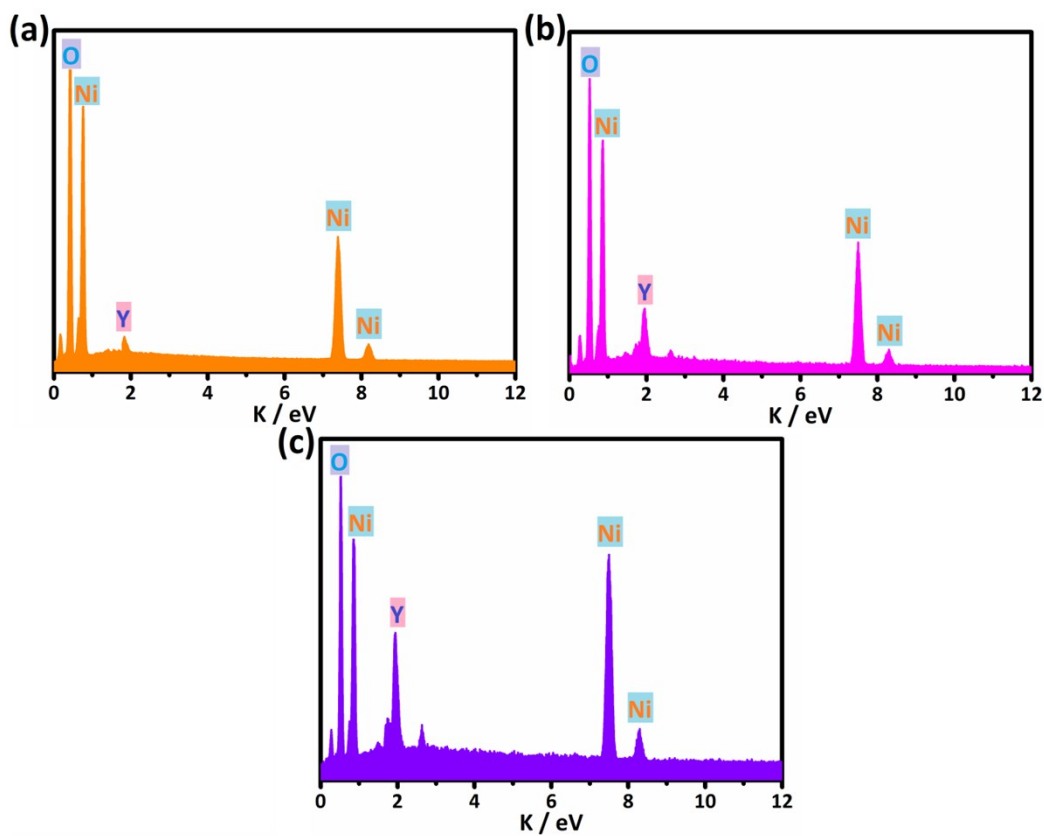

Fig. S3. EDX of the Y-Ni0, (b)Y-Ni5, (c)Y-Ni10 and (d) Y-Ni20 samples.

Table S1. the mass ratios of the Ni and Y elements in Y-Ni5, Y-Ni10 and Y-Ni20 samples.

| samples | Ni norm. (wt%) | Y norm. (wt%) | Y/Ni molar ratios |
|---------|----------------|---------------|-------------------|
| Y-Ni5   | 52.66          | 3.24          | 4.42%             |
| Y-Ni10  | 49.97          | 7.65          | 10.99%            |
| Y-Ni20  | 54.45          | 13.98         | 18.43%            |

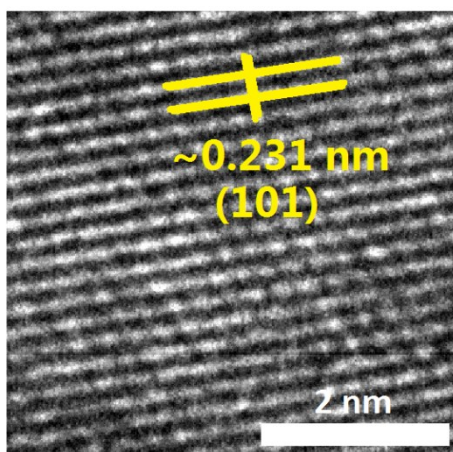

Fig. S4. HRTEM images of Y-Ni0 sample.

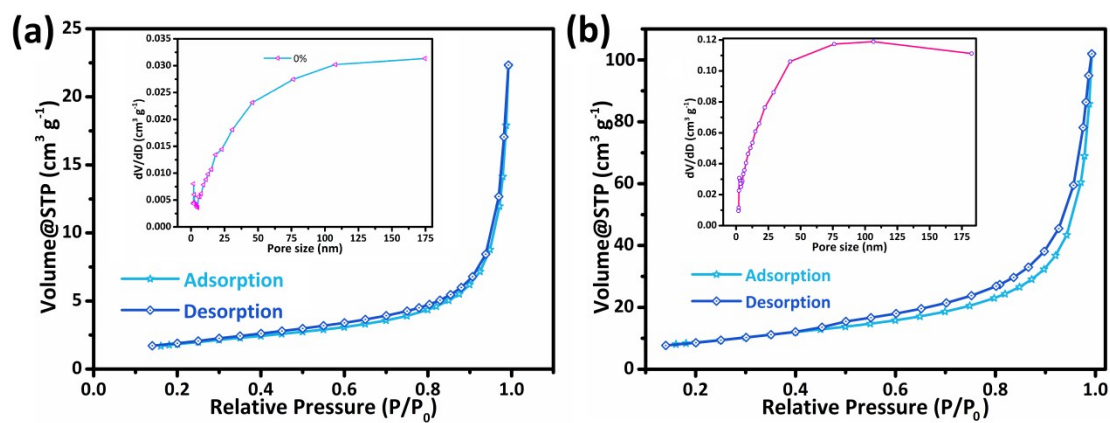

Fig. S5. N<sub>2</sub> adsorption-desorption isotherm of (a) Y-Ni0 and (b) Y-Ni5 samples (insets of the pore distribution).

**Table S2.** A comparison study of BET and pore diameter.

| Sample | Specific surface area             | Total pore volume                  | Average pore diameter |
|--------|-----------------------------------|------------------------------------|-----------------------|
|        | (m <sup>2</sup> g <sup>-1</sup> ) | (cm <sup>3</sup> g <sup>-1</sup> ) | (nm)                  |
| Y-Ni0  | 6.7931                            | 0.034545                           | 20.4408               |
| Y-Ni5  | 32.0665                           | 0.157677                           | 18.3113               |
| Y-Ni10 | 119.3531                          | 0.266668                           | 7.9563                |
| Y-Ni20 | 105.2588                          | 0.214238                           | 7.3784                |

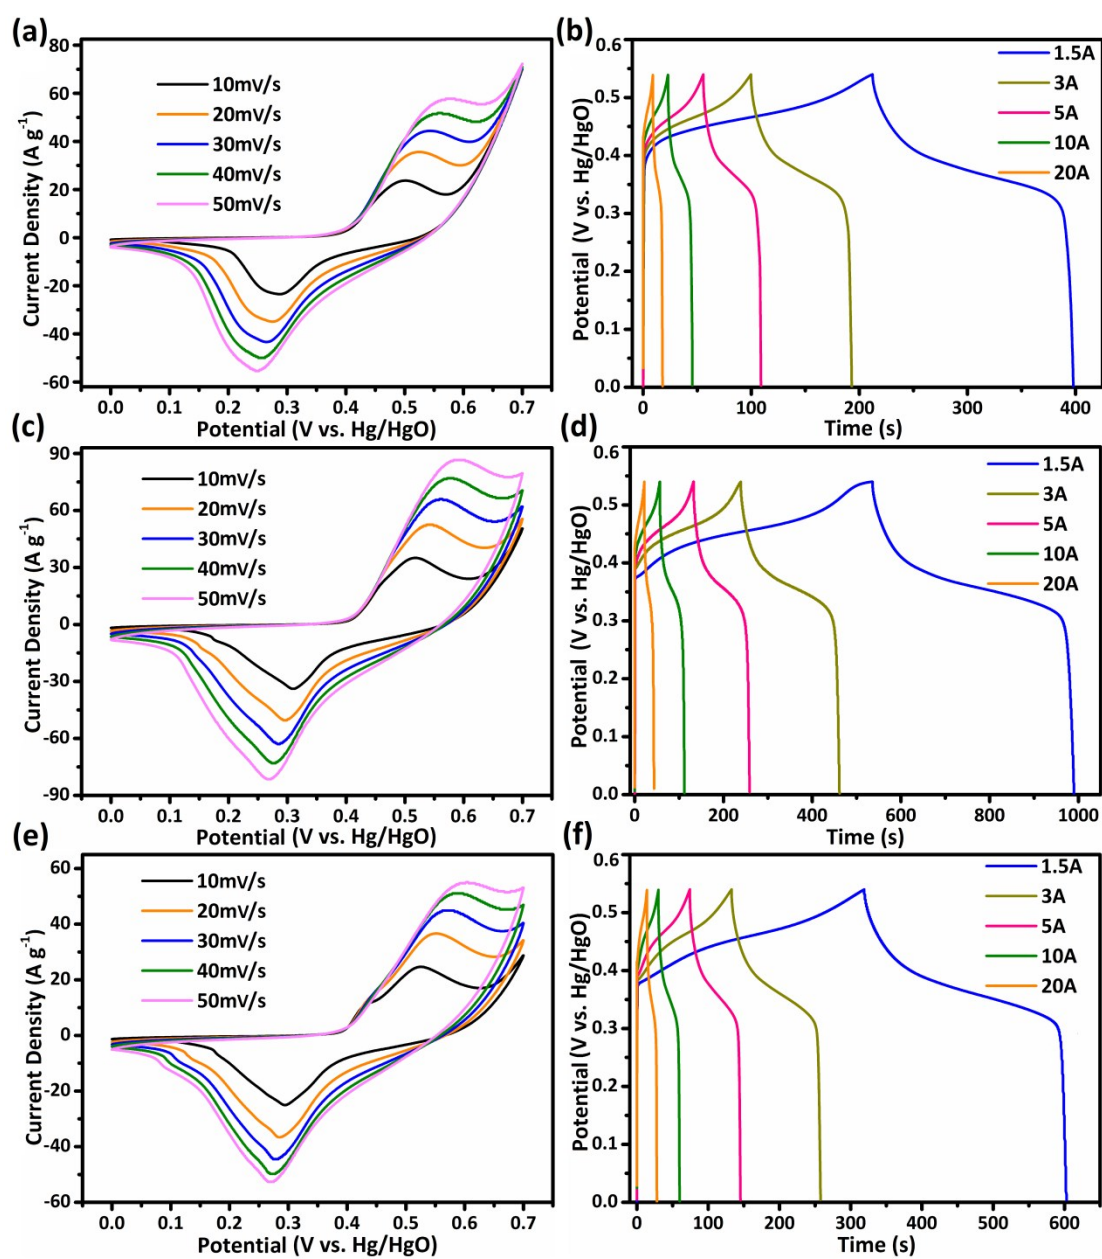

**Fig. S6.** CV curves at different scan rates of (a) Y-Ni0, (c) Y-Ni5 and (e) Y-Ni20, Galvanostatic charge-discharge curves of (b) Y-Ni0, (d) Y-Ni5 and (f) Y-Ni20.

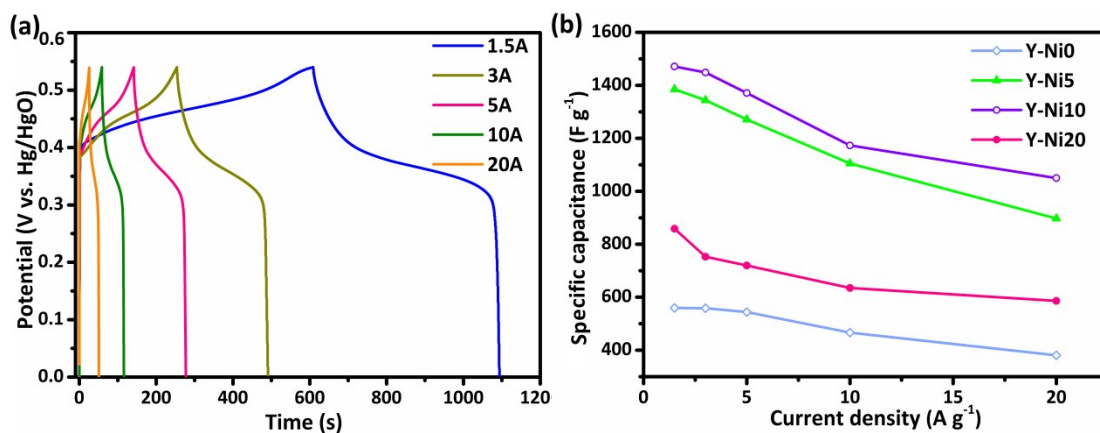

**Fig. S7.** (a) Galvanostatic charge-discharge curves of Y-Ni10; (b) Specific capacitance of Y-Ni0, Y-Ni5,

Y-Ni10 and Y-Ni20 electrodes

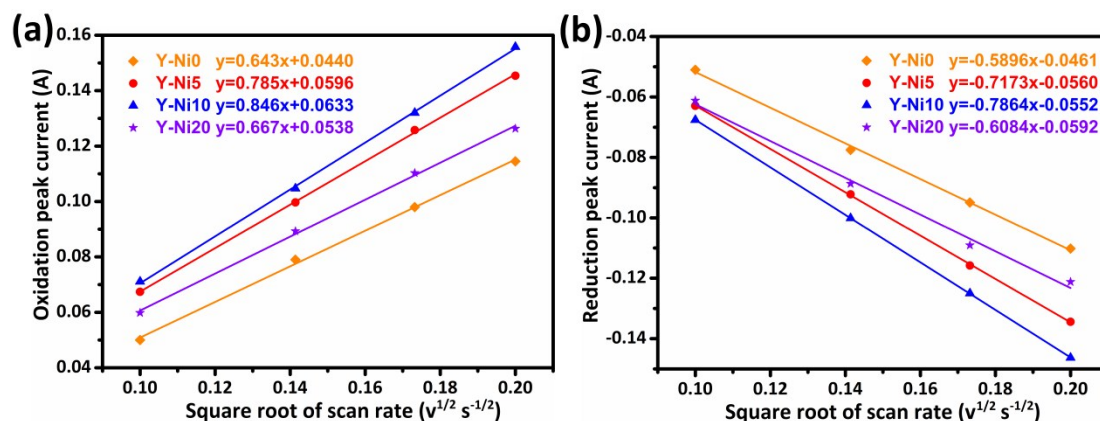

**Fig. S8.** the linear relation between the oxidation/reduction peak current and the scan rates of Y-Ni0,

Y-Ni5, Y-Ni10 and Y-Ni20.

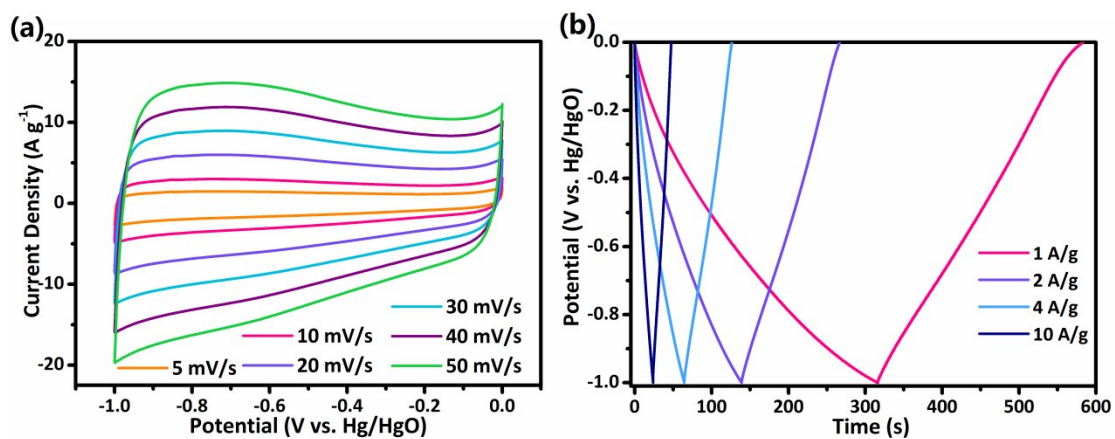

Fig. S9. CV curves at different scan rates and Galvanostatic charge-discharge curves of AC.

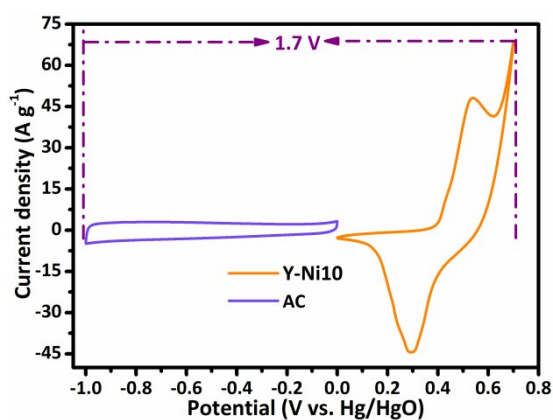

Fig. S10. (a) CV curves of the Y-Ni10 and AC electrodes in the three-electrode system at 10 mV<sup>-1</sup>.

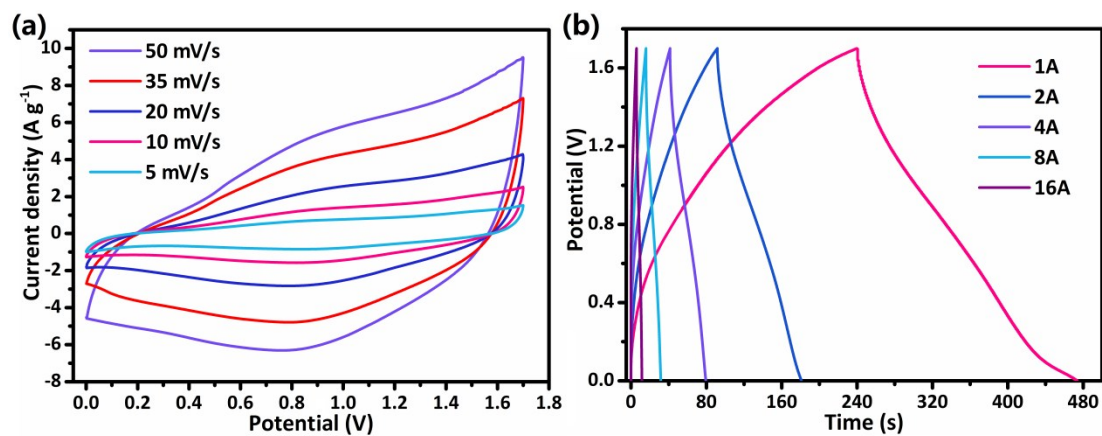

Fig. S11. (a) CV curves at different scan rates and (b) GCD curves of the Y-Ni10//AC device.

**Table S2.** The specific capacitance of various electrodes in the three-electrode system in references

| Electrode materials                        | Specific Capacity                                | capacity retention              | Refs |
|--------------------------------------------|--------------------------------------------------|---------------------------------|------|
| Ni-CO-Mn-OH/RGO                            | 665 C g <sup>-1</sup> at 2 A g <sup>-1</sup>     | 64.21% at 20 A g <sup>-1</sup>  | S1   |
| NiCoMn-OH                                  | 757 C g <sup>-1</sup> at 1 A g <sup>-1</sup>     | 48.7% at 50 A g <sup>-1</sup>   | S2   |
| NiCoAl-LDH nanoplates                      | 564.5 C g <sup>-1</sup> at 1 A g <sup>-1</sup>   | 59% at 30 A g <sup>-1</sup>     | S3   |
| Co <sub>3</sub> O <sub>4</sub> @NiCoAl-LDH | 441.6 C g <sup>-1</sup> at 1 A g <sup>-1</sup>   | 60.05% at 20 A g <sup>-1</sup>  | S4   |
| Al-Ni(OH) <sub>2</sub> nanosheets          | 849 C g <sup>-1</sup> at 1 A g <sup>-1</sup>     | 65.4 % at 6 A g <sup>-1</sup>   | S5   |
| CoMn LDH                                   | 531.3 C g <sup>-1</sup> at 0.7 A g <sup>-1</sup> | 69.1% at 28.6 A g <sup>-1</sup> | S6   |
| NiMn-LDH/rGO                               | 625 C g <sup>-1</sup> at 1 A g <sup>-1</sup>     | 36.0% at 5 A g <sup>-1</sup>    | S7   |
| Glucose NiMn-LDH                           | 732 C g <sup>-1</sup> at 1 A g <sup>-1</sup>     | 59.4% at 10 A g <sup>-1</sup>   | S8   |
| Core-Shell NiAl-LDH                        | 367.5 C g <sup>-1</sup> at 2 A g <sup>-1</sup>   | 75.0% at 25 A g <sup>-1</sup>   | S9   |
| CoAl-LDH                                   | 339.3 C g <sup>-1</sup> at 1 A g <sup>-1</sup>   | 73.6 at 20 A g <sup>-1</sup>    | S10  |
| CoAl-LDH/FGN                               | 611 C g <sup>-1</sup> at 1 A g <sup>-1</sup>     | 75.3% at 10 A g <sup>-1</sup>   | S11  |

## References

[S1] B. Zhao, L. Zhang, Q. Zhang, D. Chen, Y. Cheng, X. Deng, Y. Chen, R. Murphy, X. Xiong, B. Song, C.P. Wong, M.S. Wang, M. Liu, Rational Design of Nickel Hydroxide-Based Nanocrystals on Graphene for Ultrafast Energy Storage, *Adv. Energy Mater.* 8 (2017) 1702247.

[S2] Y. Zhu, C. Huang, C. Li, M. Fan, K. Shu, H.C. Chen, Strong synergetic electrochemistry between



transition metals of  $\alpha$  phase Ni-Co-Mn hydroxide contributed superior performance for hybrid Supercapacitors, *J. Power Sources* 412 (2019) 559-567.

[S3] J. Yang, C. Yu, X. Fan, J. Qiu, 3D Architecture Materials Made of NiCoAl-LDH Nanoplates Coupled with NiCo-Carbonate Hydroxide Nanowires Grown on Flexible Graphite Paper for Asymmetric Supercapacitors, *Adv. Energy Mater.* 4 (2015) 400761.

[S4] X. Li, Z. Yang, W. Qi, Y. Li, Y. Wu, S. Zhou, S. Huang, J. Wei, H. Li, P. Yao, Binder-free  $\text{Co}_3\text{O}_4$ @NiCoAl-layered double hydroxide core-shell hybrid architectural nanowire arrays with enhanced electrochemical performance, *Appl. Surf. Sci.* 363 (2016) 381-388.

[A5] J. Huang, T. Lei, X. Wei, X. Liu, T. Liu, D. Cao, J. Yin, G. Wang, Effect of Al-doped  $\beta$ -Ni(OH)<sub>2</sub> nanosheets on electrochemical behaviors for high performance supercapacitor application, *J. Power Sources* 232 (2013) 370-375.

[S6] A.D. Jagdale, G. Guan, X. Li, X. Du, X. Ma, X. Hao, A. Abudula, Ultrathin nanoflakes of cobalt manganese layered double hydroxide with high reversibility for asymmetric supercapacitor, *J. Power Sources* 306 (2016) 526-534.

[S7] M. Padmini, S.K. Kiran, N. Lakshminarasimhan, M. Sathish, P. Elumalai, High-performance Solid-state Hybrid Energy-storage Device Consisting of Reduced Graphene-Oxide Anchored with NiMn-Layered Double Hydroxide *Electrochim. Acta* 236 (2017) 359-370.

[S8] L. Lv, K. Xua, C. Wang, H. Wan, Y. Ruan, J. Liu, R. Zou, L. Miao, K.K. Ostrikov, Y. Lan, J. Jiang, Intercalation of Glucose in NiMn-Layered Double Hydroxide Nanosheets: an Effective Path Way towards Battery-type Electrodes with Enhanced Performance, *Electrochim. Acta* 216 (2016) 35-43.

[S9] M. Shao, F. Ning, Y. Zhao, J. Zhao, M. Wei, G.G. Evans, X. Duan, Core-Shell Layered Double Hydroxide Microspheres with Tunable Interior Architecture for Supercapacitors, *Chem. Mater.* 24 (2012) 1192-1197

[S10] S. Li, P. Cheng, J. Luo, D. Zhou, W. Xu, J. Li, R. Li, D. Yuan, High-performance flexible asymmetric supercapacitor based on CoAl-LDH and rGO electrodes, *Nano-Micro Lett.* 9 (2017) 31.

[S11] W. Peng, H. Li, S. Song, Synthesis of Fluorinated Graphene/CoAl-Layered Double Hydroxide Composites as Electrode Materials for Supercapacitors, *ACS Appl. Mater. Interfaces* 9 (2017) 5204-5212
